# Supplementary material for: Copper nanoparticles supported on diamond nanoparticles as a cost-effective and efficient catalyst for natural sunlight assisted Fenton reaction
Source: Royal Society of Chemistry journal article supplement (doi:10.1039/c6cy00572a), 2016-01-01
Supplement: c6cy00572a1.pdf [file c6cy00572a1.pdf]

# Copper nanoparticles supported on diamond nanoparticles as cost-effective and efficient catalyst for natural Sunlight assisted Fenton reaction

## *Supplementary material*

*Juan C. Espinosa,<sup>1</sup> Sergio Navalón,<sup>1</sup> Mercedes Álvaro,<sup>1</sup> Hermenegildo García<sup>1,2,\*</sup>*

<sup>1</sup> Departamento de Química and Instituto de Tecnología Química CSIC-UPV, Universidad Politécnica de Valencia, Consejo Superior de Investigaciones Científicas, Av. de los Naranjos s/n, 46022 Valencia, Spain

<sup>2</sup> Center of Excellence for Advanced Materials Research, King Abdulaziz University, Jeddah, Saudi Arabia

\* Corresponding author: hgarcia@qim.upv.es

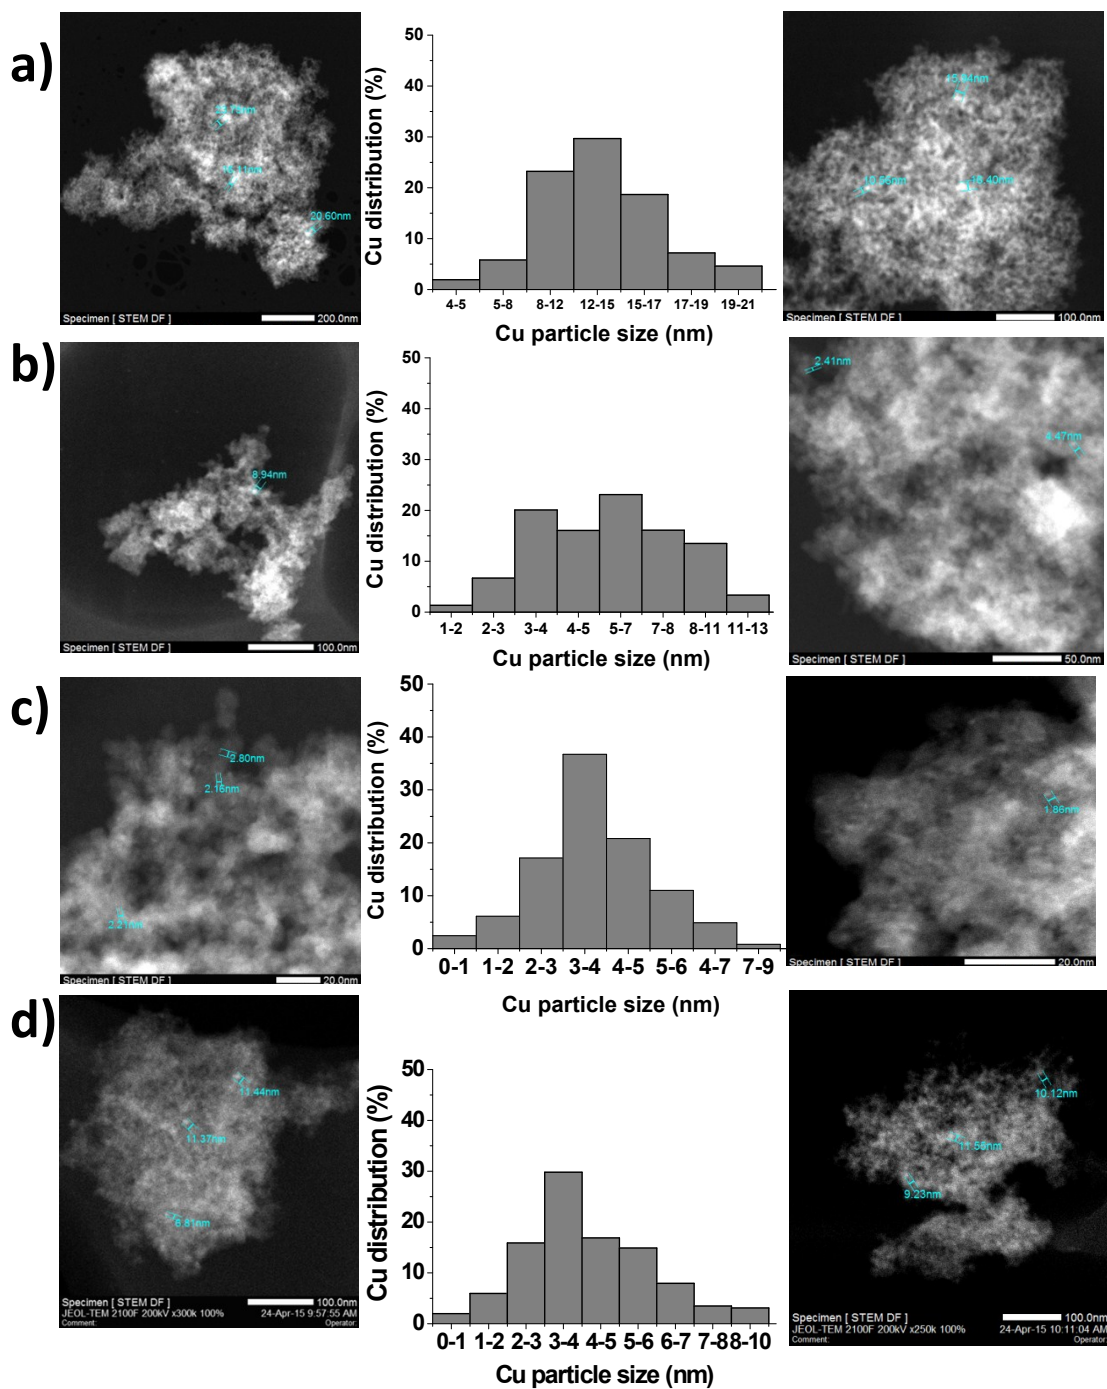

**Figure S1.** DF-STEM images and particle size distributions of Cu(0.2 wt%)/D1 (a), Cu(0.2 wt%)/D2 (b), Cu(0.2 wt%)/D3 (c) and Cu(1.0 wt%)/D3 (d). Cu average particle size for Cu(0.2 wt%)/D1 (a), Cu(0.2 wt%)/D2 (b), Cu(0.2 wt%)/D3 and Cu(1.0 wt%)/D3 (c) was  $13.4 \pm 5.3$ ,  $6.3 \pm 4.2$ ,  $3.7 \pm 2.7$  and  $11.1 \pm 5.6$  nm, respectively.

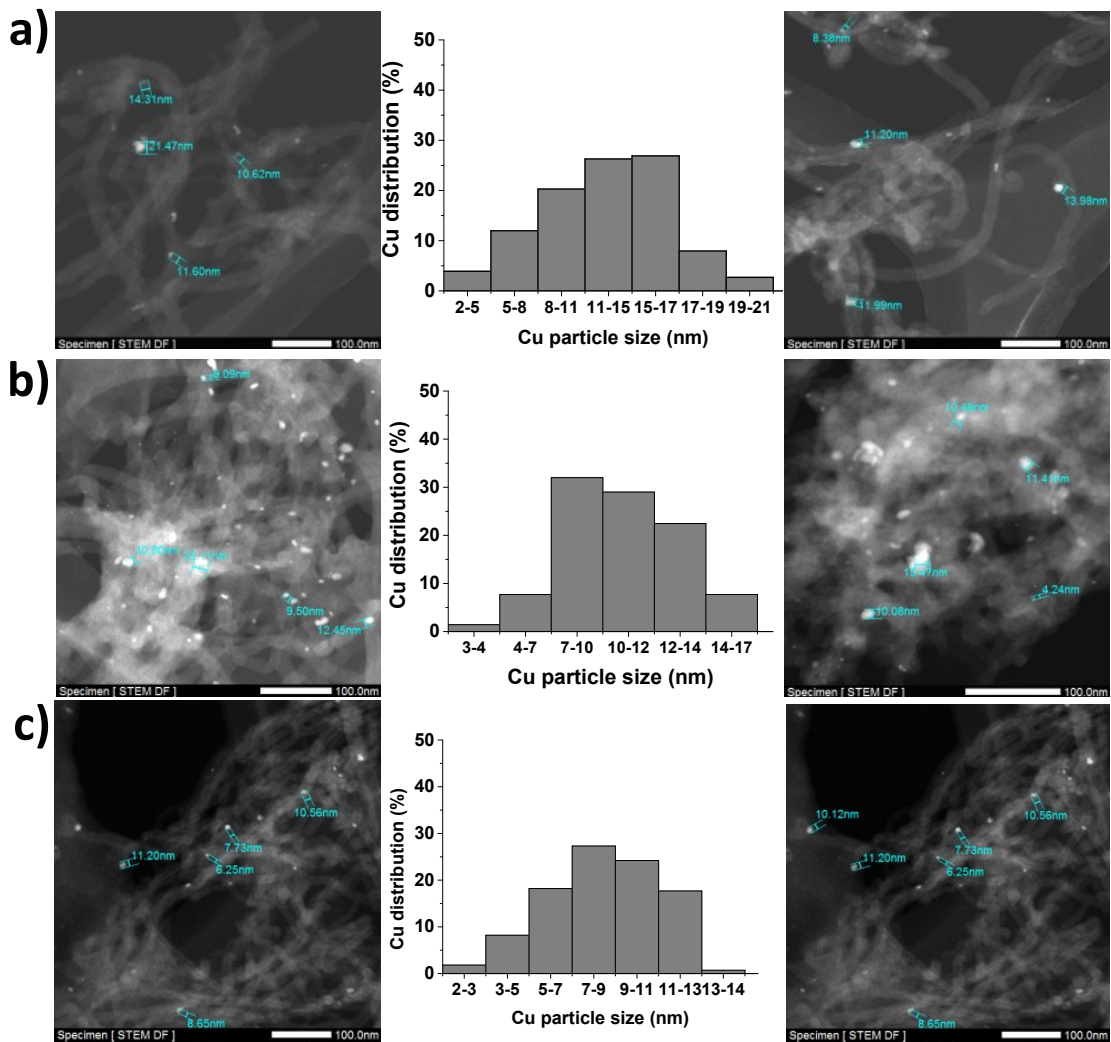

**Figure S2.** DF-STEM images and particle size distribution of Cu/NT1 (a), Cu/NT2 (b) and Cu/NT3 (c). Cu average particle size for Cu/NT1, Cu/NT2 and Cu/NT3 was  $12.2 \pm 6.0$ ,  $9.9 \pm 4.2$  and  $7.8 \pm 3.6$  nm, respectively. Note: Cu loading 0.2 wt %.

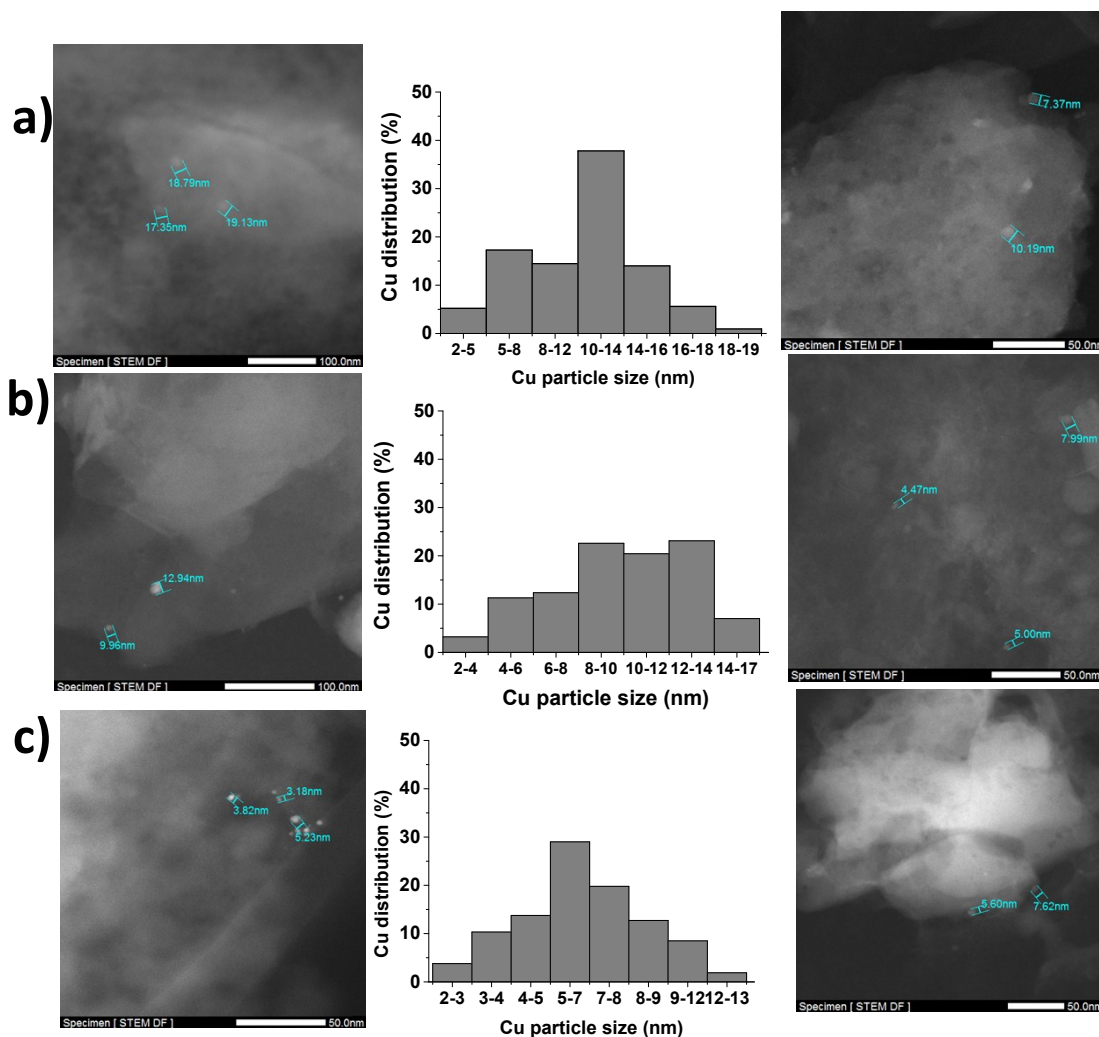

**Figure S3.** DF-STEM images and particle size distribution of Cu/AC1 (a), Cu/AC2 (b) and Cu/AC3 (c). Cu average particle size for Cu/AC1, Cu/AC2 and Cu/AC3 was  $11.4 \pm 5.3$ ,  $9.4 \pm 4.2$  and  $6.0 \pm 3.6$  nm, respectively. Note: Cu loading 0.2 wt %.

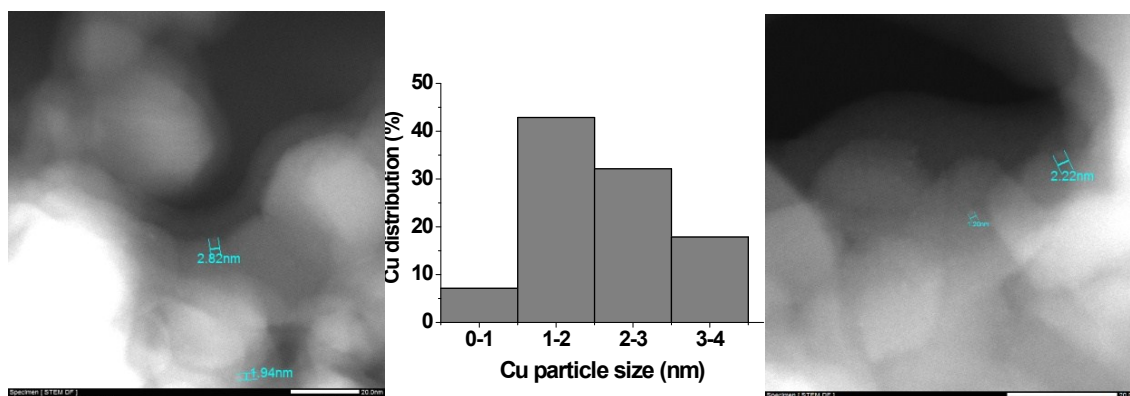

**Figure S4.** DF-STEM images and particle size distributions of Cu/TiO<sub>2</sub>. Cu average particle size of  $2.6 \pm 1.6$  nm. Note: Cu loading 0.2 wt %.

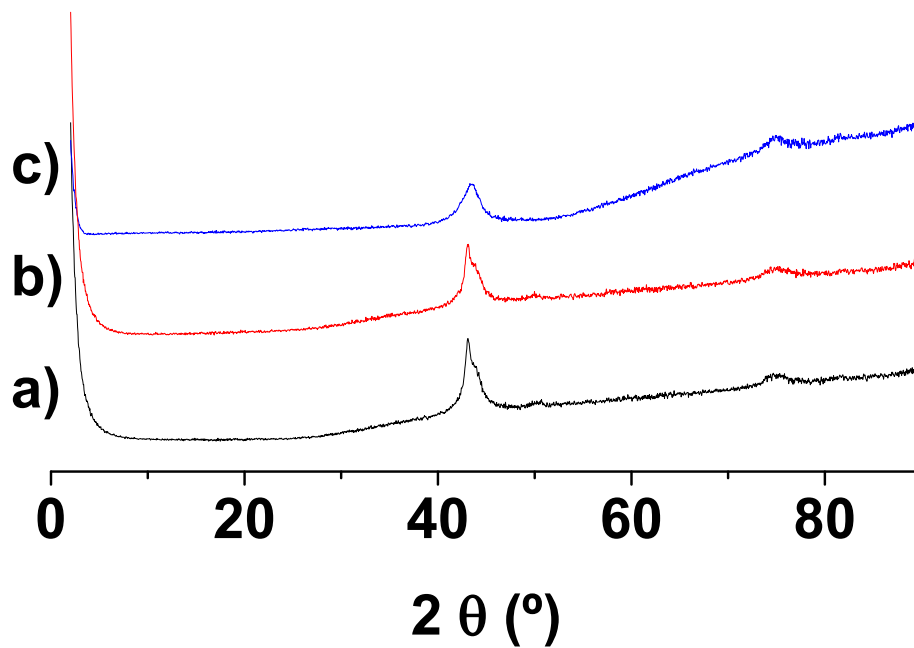

**Figure S5.** XRD diffractograms of Cu/D1 (a), Cu/D2 (b) and Cu/D3 (c). Note: Cu loading 0.2 wt %

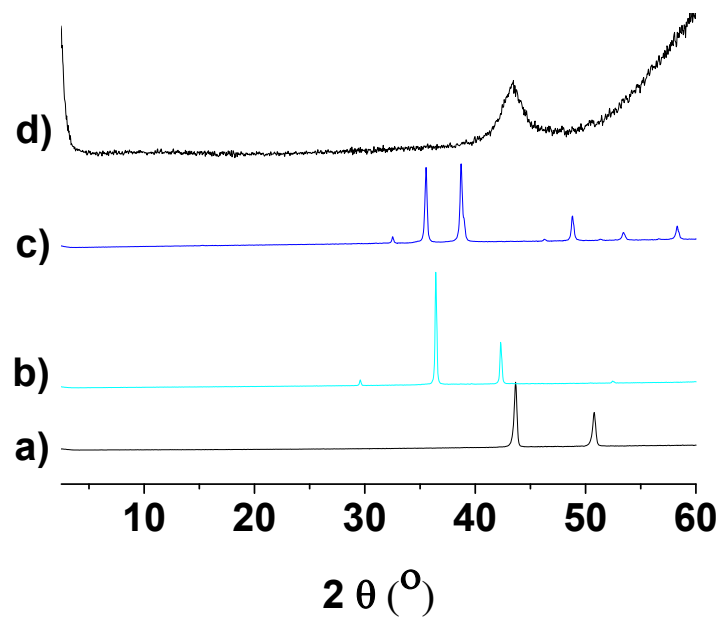

**Figure S6.** XRD diffractograms of Cu (a),  $\text{Cu}_2\text{O}$  (b), CuO (c) and Cu(1.0 wt%)/D3 (d). Note: a, b and c are commercial samples from Sigma-Aldrich.

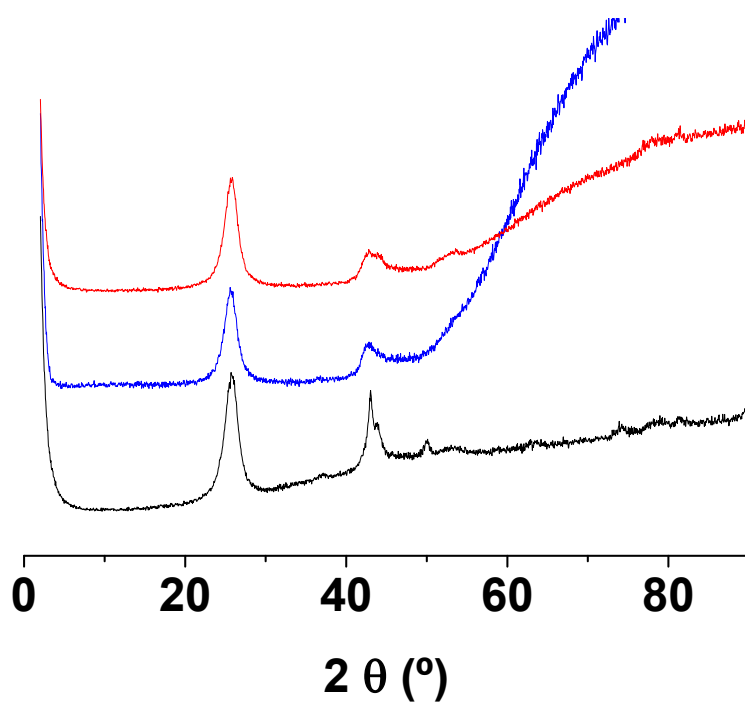

**Figure S7.** XRD diffractograms of Cu/NT1 (a), Cu/NT2 (b) and Cu/NT3 (c). Note: Cu loading 0.2 wt %.

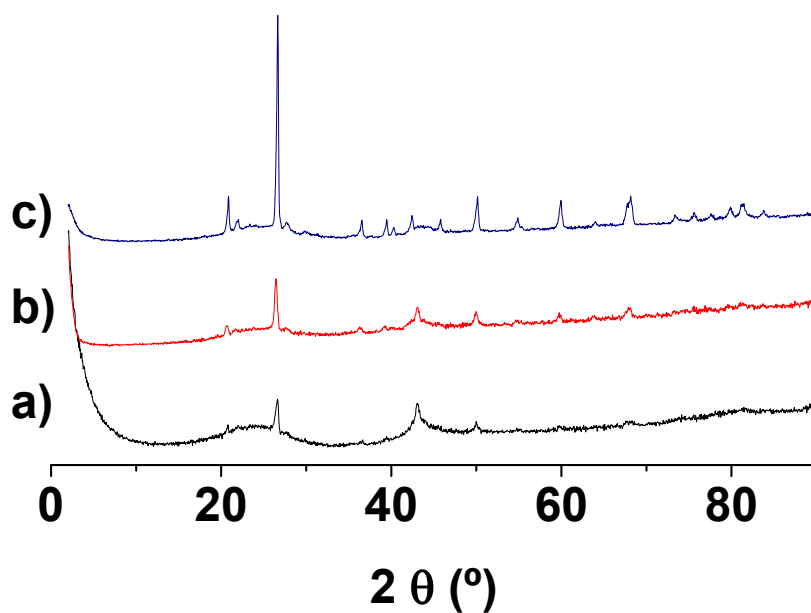

**Figure S8.** XRD diffractograms of Cu/AC1 (a), Cu/AC2 (b) and Cu/AC3 (c). Note: Cu loading 0.2 wt %.

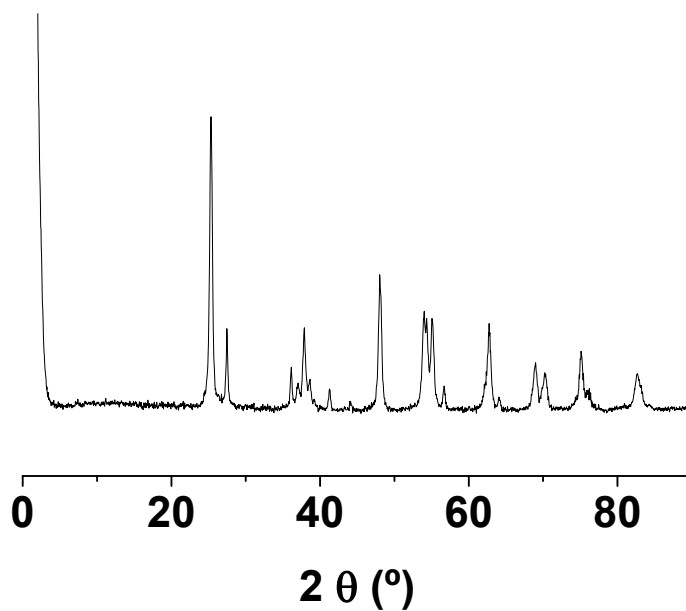

**Figure S9.** XRD diffractogram of Cu (0.2 wt%)/TiO<sub>2</sub>.

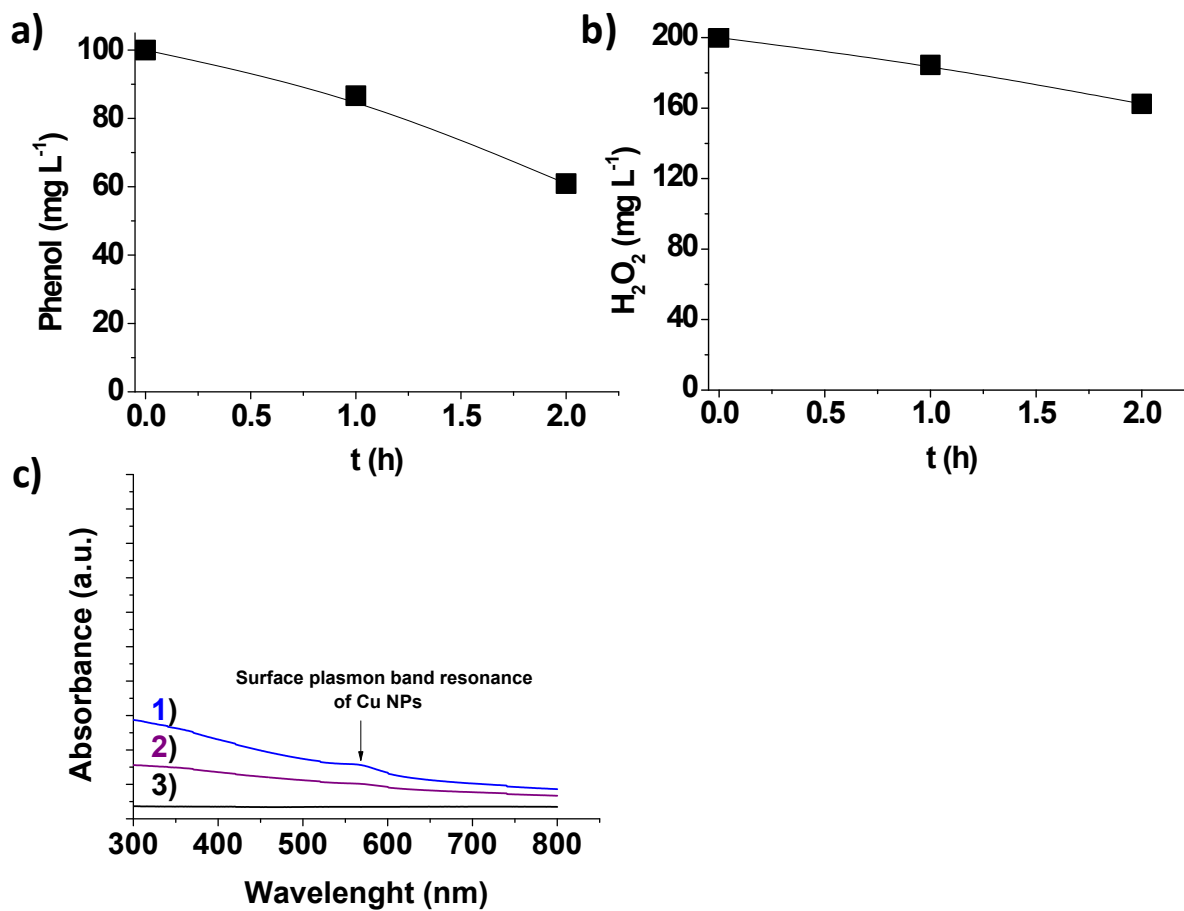

**Figure S10.** Phenol degradation (a) and H<sub>2</sub>O<sub>2</sub> decomposition (b) using unsupported Cu NPs as catalyst. c) UV-Vis spectra of unsupported Cu NPs synthesized using Cu<sup>2+</sup> at concentrations of 125 (1), 62 (2) and 0.4 mg L<sup>-1</sup> (3). Catalyst (0.4 mg L<sup>-1</sup>, 0.0063 mM of unsupported Cu NPs), phenol (100 mg L<sup>-1</sup>; 1.06 mM), H<sub>2</sub>O<sub>2</sub> (200 mg L<sup>-1</sup>; 5.88 mM), initial pH 4.



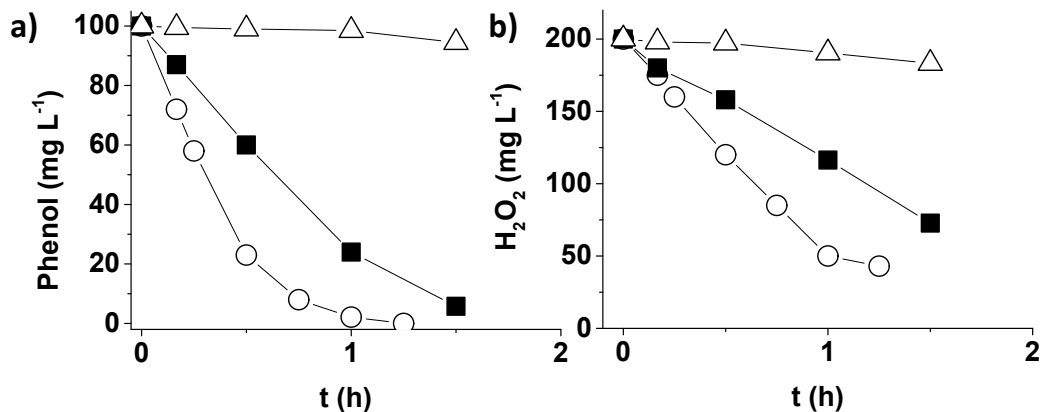

**Figure S11.** Phenol degradation (a) and H<sub>2</sub>O<sub>2</sub> decomposition (b) using Cu NPs supported on D-based materials under natural Sunlight irradiation. Legend: Cu/D3 (○), Cu/D2 (■) and Cu/D1 (Δ). Catalyst (200 mg L<sup>-1</sup>; 0.0063 mM of supported Cu NPs), phenol (100 mg L<sup>-1</sup>; 1.06 mM), H<sub>2</sub>O<sub>2</sub> (200 mg L<sup>-1</sup>; 5.88 mM), initial pH 4.

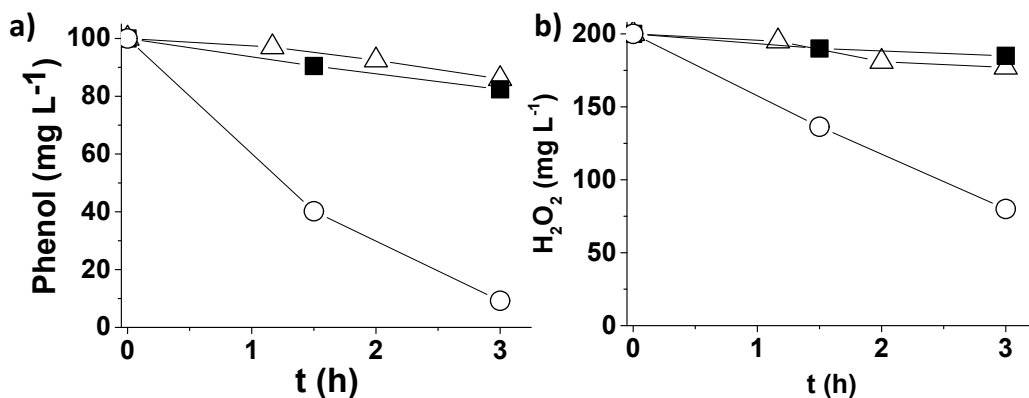

**Figure S12.** Phenol degradation (a) and H<sub>2</sub>O<sub>2</sub> decomposition (b) using Cu NPs supported on AC-based materials under natural Sunlight irradiation. Legend: Cu/AC3 (○), Cu/AC2 (■) and Cu/AC1 (Δ). Catalyst (200 mg L<sup>-1</sup>; 0.0063 mM of supported Cu NPs), phenol (100 mg L<sup>-1</sup>; 1.06 mM), H<sub>2</sub>O<sub>2</sub> (200 mg L<sup>-1</sup>; 5.88 mM), initial pH 4.

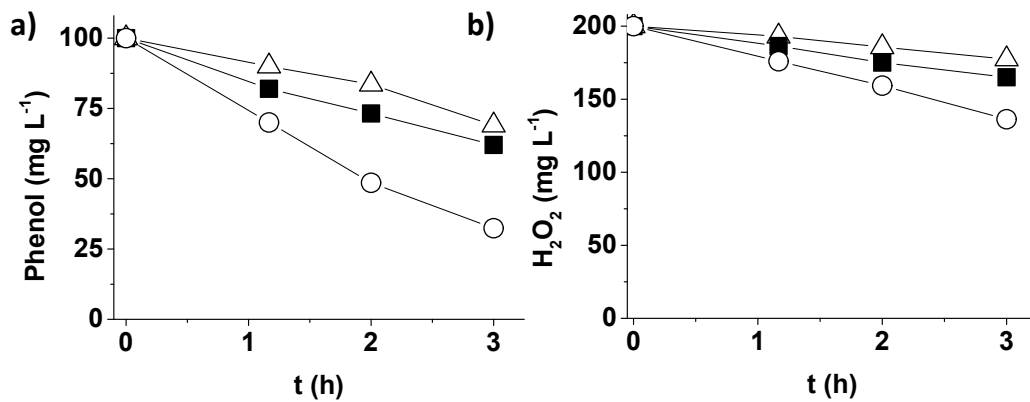

**Figure S13.** Phenol degradation (a) and H<sub>2</sub>O<sub>2</sub> decomposition (b) using Cu NPs supported on NTs-based materials under natural Sunlight irradiation. Legend: Cu/NT1 (Δ), Cu/NT2 (■) and Cu/NT3 (○). Catalyst (200 mg L<sup>-1</sup>; 0.0063 mM of supported Cu NPs), phenol (100 mg L<sup>-1</sup>; 1.06 mM), H<sub>2</sub>O<sub>2</sub> (200 mg L<sup>-1</sup>; 5.88 mM), initial pH 4.

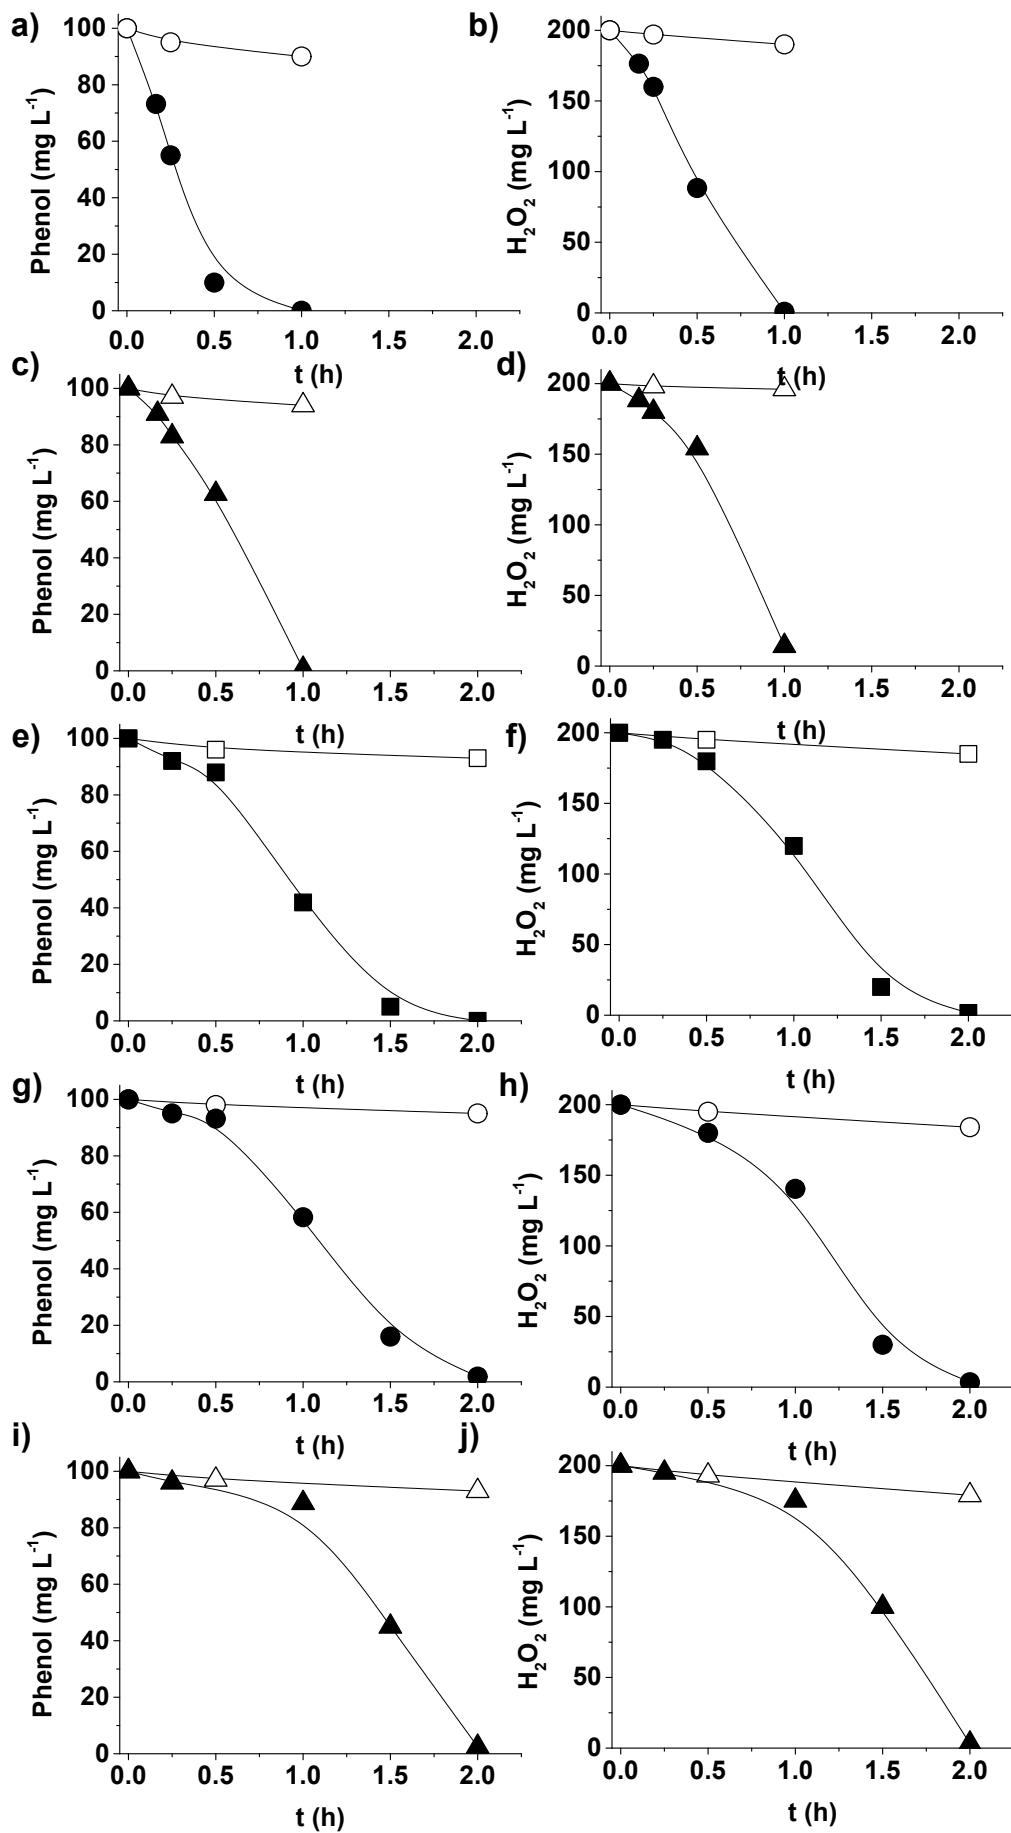

**Figure S14.** Phenol degradation (a, c, e, g, i) and H<sub>2</sub>O<sub>2</sub> decomposition (b, d, f, h, j) as a function of the initial pH value under dark (empty symbols) and natural Sunlight (full symbols) irradiation using Cu/D3. Legend: pH 4 (a, b), 4.5 (c, d), 5.5 (e, f), 6.5 (g, h) and 7.5 (i, j). Reaction conditions: Catalyst (200 mg L<sup>-1</sup>; 0.0063 mM of supported Cu NPs), phenol (100 mg L<sup>-1</sup>; 1.06 mM), H<sub>2</sub>O<sub>2</sub> (200 mg L<sup>-1</sup>; 5.88 mM), pH 4, natural Sunlight irradiation intensity (1.2 mWcm<sup>-2</sup>), temperature (42 °C).

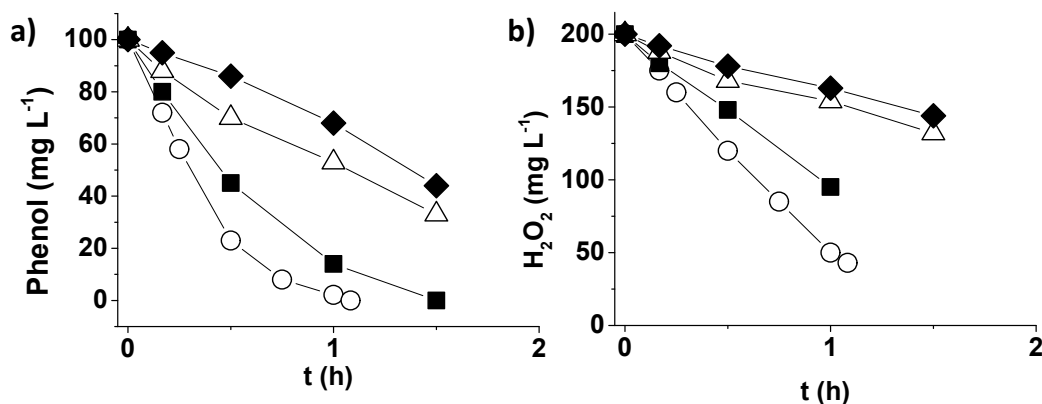

**Figure S15.** Reusability test for phenol degradation (a) and H<sub>2</sub>O<sub>2</sub> decomposition (b) using Cu/D3 as catalyst under natural Sunlight irradiation. Legend: run 1 (○), run 2 (■), run 3 (△) and run 4 (◆). Note: After every use the catalyst was recovered by filtration, washed using basic water (pH 10) and distilled H<sub>2</sub>O and, then, used for the subsequent run without any additional treatment to the catalyst. Catalyst (200 mg L<sup>-1</sup>; 0.0063 mM of supported Cu NPs), phenol (100 mg L<sup>-1</sup>; 1.06 mM), H<sub>2</sub>O<sub>2</sub> (200 mg L<sup>-1</sup>; 5.88 mM), initial pH 4.

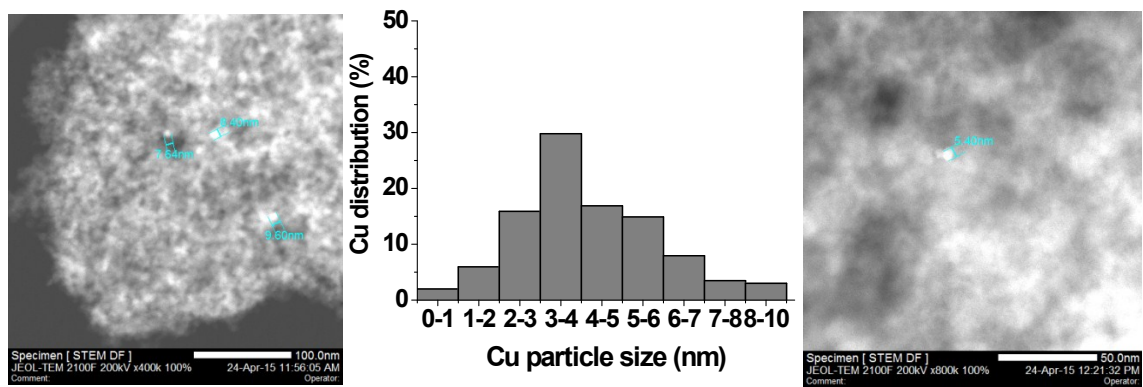

**Figure S16.** DF-STEM images and particle size distribution of Cu (0.2 wt%)/D3 after eight uses. Copper average particle size of  $4.2 \pm 2.9$  nm.

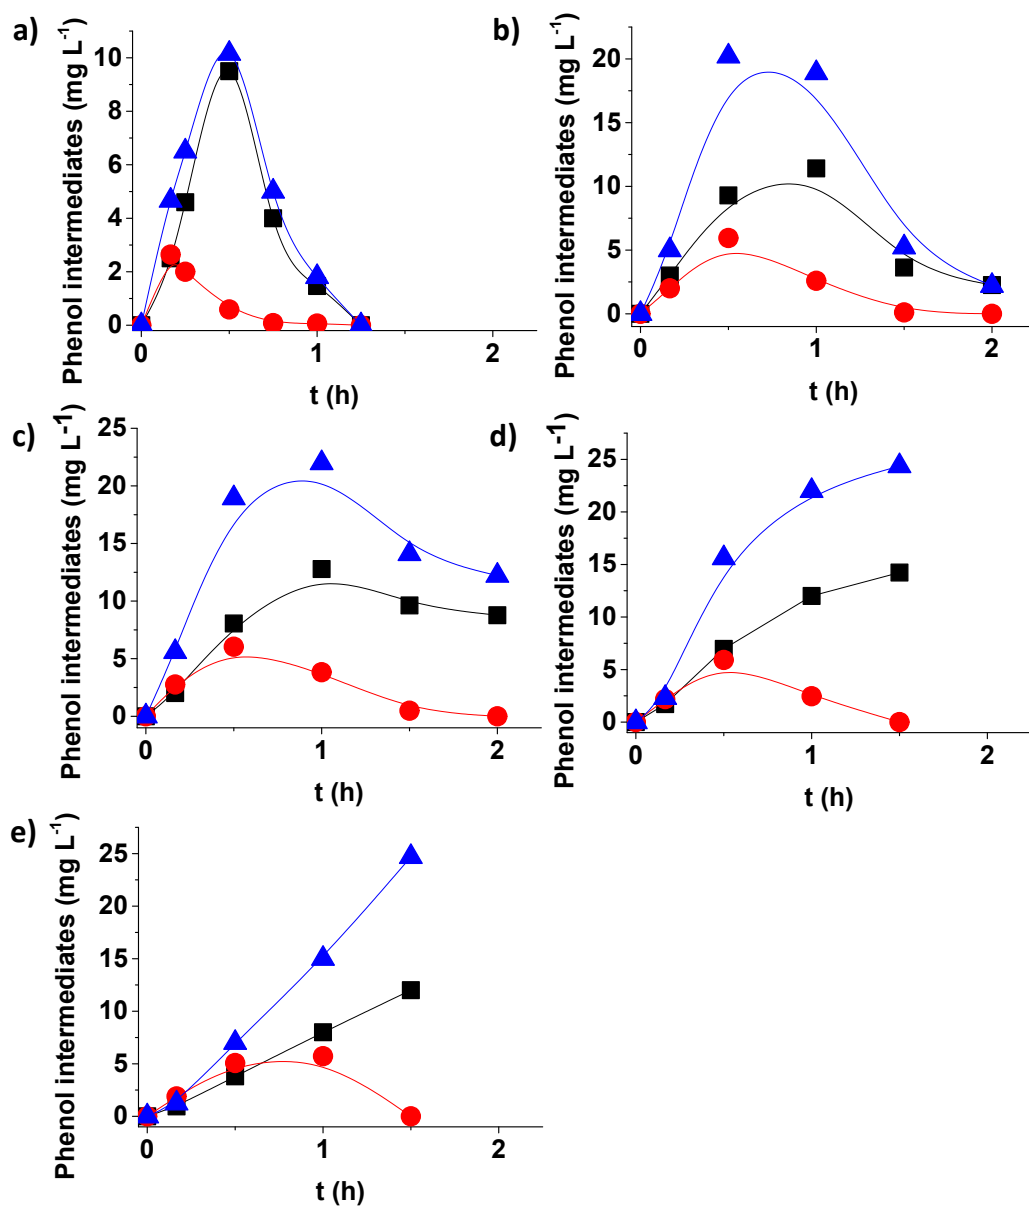

**Figure S17.** Influence of H<sub>2</sub>O<sub>2</sub> to phenol molar ratio for the degradation of phenol and its reaction intermediates (catechol, hydroquinone and *p*-benzoquinone) using Cu/D3 as catalyst under natural Sunlight irradiation. 5.5 (a), 4 (b), 3 (c), 2 (d) and 1 (e) equivalent. Catalyst (200 mg L<sup>-1</sup>; 0.0063 mM of supported Cu NPs), phenol (100 mg L<sup>-1</sup>; 1.06 mM), H<sub>2</sub>O<sub>2</sub> as indicated, pH 4. Legend: Catechol (blue triangle), hydroquinone (black square) and *p*-benzoquinone (red circle).

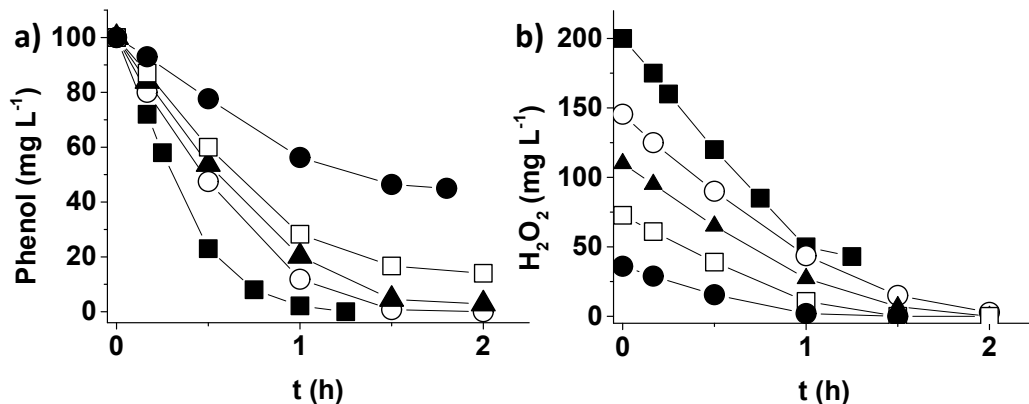

**Figure S18.** Influence of  $\text{H}_2\text{O}_2$  to phenol molar ratio for phenol degradation (a) and  $\text{H}_2\text{O}_2$  decomposition (b) using Cu/D3 as catalyst under natural Sunlight irradiation. Legend: 5.5 (■), 4.0 (○), 3.0 (▲), 2.0 (□) and 1.0 (●)  $\text{H}_2\text{O}_2$  to phenol molar ratio. Catalyst ( $200 \text{ mg L}^{-1}$ ), phenol ( $100 \text{ mg L}^{-1}$ ;  $1.06 \text{ mM}$ ),  $\text{H}_2\text{O}_2$  (as indicated), initial pH 4.

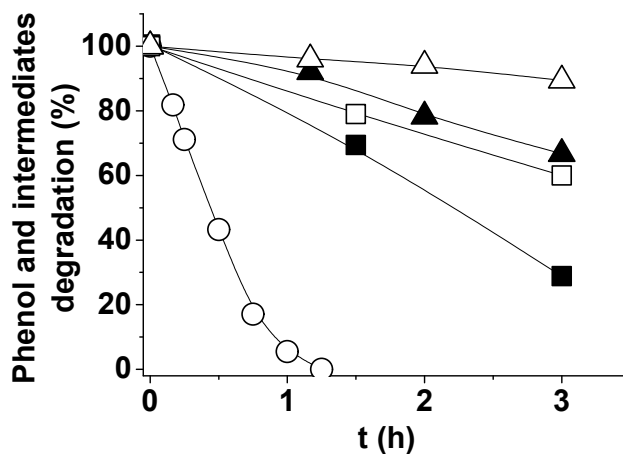

**Figure S19.** Phenol and reaction intermediates (catechol, hydroquinone and *p*-benzoquinone) degradation using Cu/D3 (○), Cu/AC3 (■), Cu/NT3 (▲), Cu/TiO<sub>2</sub> (□) and Cu/TiO<sub>2</sub> without  $\text{H}_2\text{O}_2$  (Δ) as catalysts under natural Sunlight irradiation. Catalyst ( $200 \text{ mg L}^{-1}$  and  $0.0063 \text{ mM}$  of supported Cu NPs), phenol ( $100 \text{ mg L}^{-1}$ ;  $1.06 \text{ mM}$ ),  $\text{H}_2\text{O}_2$  ( $200 \text{ mg L}^{-1}$ ;  $5.88 \text{ mM}$ ), initial pH 4.
